# Supplementary material for: Coral affected by stony coral tissue loss disease can produce viable offspring
Source: PeerJ. 2023 Jul 14;11:e15519. doi: 10.7717/peerj.15519 (PMC10351504; doi:10.7717/peerj.15519)
Supplement: Data S1 — Data points indicate number of settlers and their size per sustrate unit in the lab aquaria and once outplanted onto the reef. [file peerj-11-15519-s001.xlsx]

## Sheet: Spawning data
SPECIE	Pseudodiploria strigosa
Cohort	2018 and 2020
NAFM = Nights After Full Moon
MAS= Minutes After Sunset
	Spawning events
Year	2018	2020
Spawning Month	August
NAFM	6	7
Reef Site	Bocana
Colonies that spawned	3	2
Colonies with gamete collection	3	2
Colony condition	Aparently healthy colonies
Area of monitoring (m2)	150	375
Time of setting MAS	195	235
Spawning time MAS	206	260

## Sheet: Settlers per SU_2018
SPECIES	Pseudodiploria strigosa										SPECIES	Pseudodiploria strigosa
Cohort	2018										Cohort	2018
The data show the number of recruits per seeding unit, recorded after 16 days of settlement on tetrapod substrates.											NA = substrate was not found during this survey
Settlement was monitored in 10 seeding units per incubator randomly selected.											Data show the number of recruits per planting unit that were recorded after planting on the reef at ages 1, 3, 7 and 14 months, noting that the recruits were planted at one month of age.
												# Recruts per seeding unit
												Month old	Month old	Month old	Month old	Month old
	Seeding unit #	# incubator	# Recruits per seeding unit								Seeding unit #	#1	#3	#7	#11	#14
	HJ-1	1	21								H2	42	2	0	NA	0
	HJ-2	1	3								H1	55	NA	NA	NA	0
	HJ-3	1	35								H3	14	0	0	NA	0
	HJ-4	1	2								H4	62	25	17	NA	0
	HJ-5	1	4								H5	14	NA	NA	NA	NA
	HJ-6	1	19								H6	9	0	NA	NA	NA
	HJ-7	1	5								H7	23	NA	2	2	1
	HJ-8	1	12								H8	13	NA	0	0	0
	HJ-9	1	1								H9	36	NA	NA	NA	NA
	HJ-10	1	9								H10	2	0	NA	NA	NA
	HJ-21	6	6
	HJ-22	6	2
	HJ-23	6	2
	HJ-24	6	3
	HJ-25	6	1
	HJ-26	6	2
	HJ-27	6	7
	HJ-28	6	12
	HJ-29	6	5
	HJ-30	6	10
	HJ-31	7	154
	HJ-32	7	260
	HJ-33	7	85
	HJ-34	7	184
	HJ-35	7	23
	HJ-36	7	114
	HJ-37	7	50
	HJ-38	7	170
	HJ-39	7	210
	HJ-40	7	44

## Sheet: Settlers per SU_2020 in lab
SPECIE	Pstrig
Cohort	2020
Rearing in lab (aquaria)
During the lab rearing phase, substrates were sampled haphazardly (from a larger population of settled substrates) for the number of live recruits during each survey (i.e. different sample each time period)
SN: Seeding unit without a tag number
Seeding unit #	# incubator	month (post-settlement)	# recruits per substrate
263	A3	0.5	180
261	A3	0.5	26
270	A3	0.5	63
265	A3	0.5	49
268	A3	0.5	34
269	A3	0.5	76
266	A3	0.5	19
246	A3	0.5	23
262	A3	0.5	76
267	A3	0.5	38
258	A3	0.5	41
259	A3	0.5	69
257	A3	0.5	23
253	A3	0.5	53
254	A3	0.5	220
252	A3	0.5	210
260	A3	0.5	80
255	A3	0.5	52
256	A3	0.5	120
251	A3	0.5	65
276	A5	0.5	167
278	A5	0.5	244
280	A5	0.5	73
275	A5	0.5	162
274	A5	0.5	244
273	A5	0.5	207
277	A5	0.5	328
272	A5	0.5	109
279	A5	0.5	118
271	A5	0.5	46
SN	A5	0.5	13
SN	A5	0.5	8
308	A5	0.5	144
309	A5	0.5	32
307	A5	0.5	66
303	A5	0.5	115
302	A5	0.5	47
306	A5	0.5	120
305	A5	0.5	21
310	A5	0.5	105
304	A5	0.5	226
301	A5	0.5	97
235	A6	0.5	87
232	A6	0.5	142
234	A6	0.5	27
236	A6	0.5	164
239	A6	0.5	280
231	A6	0.5	22
238	A6	0.5	89
237	A6	0.5	237
233	A6	0.5	418
240	A6	0.5	143
SN	A6	0.5	14
296	A6	0.5	53
SN	A6	0.5	61
SN	A6	0.5	5
SN	A6	0.5	6
SN	A6	0.5	195
SN	A6	0.5	5
SN	A6	0.5	72
SN	A6	0.5	78
SN	A6	0.5	130
SN	A6	0.5	0
296	A6	0.5	53
294	A6	0.5	61
298	A6	0.5	195
297	A6	0.5	72
289	A6	0.5	78
290	A6	0.5	130
293	A6	0.5	55
300	A6	0.5	132
295	A6	0.5	58
284	A7	0.5	61
287	A7	0.5	134
292	A7	0.5	186
282	A7	0.5	179
285	A7	0.5	106
291	A7	0.5	76
283	A7	0.5	261
281	A7	0.5	57
286	A7	0.5	39
288	A7	0.5	36
247	A7	0.5	103
243	A7	0.5	65
242	A7	0.5	47
250	A7	0.5	32
264	A7	0.5	70
241	A7	0.5	170
249	A7	0.5	53
245	A7	0.5	233
248	A7	0.5	105
244	A7	0.5	79
231	Tank	4	3
232	Tank	4	11
233	Tank	4	92
234	Tank	4	20
235	Tank	4	16
236	Tank	4	31
237	Tank	4	27
238	Tank	4	23
239	Tank	4	24
240	Tank	4	15
241	Tank	4	38
242	Tank	4	6
243	Tank	4	3
244	Tank	4	1
245	Tank	4	1
246	Tank	4	3
247	Tank	4	26
248	Tank	4	6
249	Tank	4	22
250	Tank	4	8
251	Tank	4	21
252	Tank	4	18
253	Tank	4	2
254	Tank	4	54
255	Tank	4	2
256	Tank	4	8
257	Tank	4	3
258	Tank	4	3
259	Tank	4	0
260	Tank	4	1
261	Tank	4	3
262	Tank	4	1
263	Tank	4	39
264	Tank	4	1
265	Tank	4	1
266	Tank	4	7
267	Tank	4	1
268	Tank	4	2
269	Tank	4	2
270	Tank	4	11
271	Tank	4	3
272	Tank	4	23
273	Tank	4	34
274	Tank	4	50
275	Tank	4	10
276	Tank	4	3
277	Tank	4	1
278	Tank	4	50
279	Tank	4	6
280	Tank	4	20
281	Tank	4	1
282	Tank	4	19
283	Tank	4	3
284	Tank	4	2
285	Tank	4	15
286	Tank	4	19
287	Tank	4	3
288	Tank	4	3
289	Tank	4	38
290	Tank	4	27
291	Tank	4	9
292	Tank	4	30
293	Tank	4	44
294	Tank	4	23
295	Tank	4	72
296	Tank	4	1
297	Tank	4	35
298	Tank	4	77
299	Tank	4	11
300	Tank	4	1
301	Tank	4	16
302	Tank	4	1
303	Tank	4	13
304	Tank	4	19
305	Tank	4	18
306	Tank	4	3
307	Tank	4	22
308	Tank	4	15
309	Tank	4	4
310	Tank	4	39
1593	Tank	13	16
1599	Tank	13	1
1436	Tank	13	3
1454	Tank	13	5
2123	Tank	13	1
2175	Tank	13	2
1583	Tank	13	2
1577	Tank	13	3
2166	Tank	13	20
1598	Tank	13	2
1417	Tank	13	3
1590	Tank	13	1
1574	Tank	13	2
1584	Tank	13	2
1438	Tank	13	15
1401	Tank	13	1
1493	Tank	13	9
1409	Tank	13	3
1406	Tank	13	1
1579	Tank	13	17
1464	Tank	13	2
1490	Tank	13	17
1497	Tank	13	19
1491	Tank	13	12
2177	Tank	13	1
1476	Tank	13	1
1428	Tank	13	5
2188	Tank	13	4
1477	Tank	13	1
1575	Tank	13	2
2174	Tank	13	3
1596	Tank	13	14
1473	Tank	13	9
2167	Tank	13	44
2161	Tank	13	10
1448	Tank	13	3
2165	Tank	13	17
2172	Tank	13	1
1492	Tank	13	11
1437	Tank	13	2
1469	Tank	13	22
2180	Tank	13	3
1487	Tank	13	10
1471	Tank	13	12
1427	Tank	13	4
1435	Tank	13	14
1433	Tank	13	5
1495	Tank	13	5
2168	Tank	13	6
1478	Tank	13	15
1446	Tank	13	15
1407	Tank	13	6
1458	Tank	13	21
1423	Tank	13	9
1415	Tank	13	1
2158	Tank	13	23
1456	Tank	13	16
1498	Tank	13	7
2163	Tank	13	31
1494	Tank	13	5
1482	Tank	13	28
1595	Tank	13	8
2178	Tank	13	3
1500	Tank	13	16
1414	Tank	13	23
1480	Tank	13	8
1484	Tank	13	3
1488	Tank	13	8
1408	Tank	13	1
1440	Tank	13	1
2176	Tank	13	2
1416	Tank	13	18
1594	Tank	13	8
1580	Tank	13	9
1403	Tank	13	11
2183	Tank	13	7
1570	Tank	13	3
2181	Tank	13	49
2169	Tank	13	64
1573	Tank	13	2
1582	Tank	13	2
1405	Tank	13	6
1575	Tank	13	2
1581	Tank	13	3
1404	Tank	13	9
1466	Tank	13	10
1489	Tank	13	3
2164	Tank	13	64
2184	Tank	13	20
2170	Tank	13	1
1499	Tank	13	14
1587	Tank	13	3
1429	Tank	13	11
2182	Tank	13	31
1597	Tank	13	3
1474	Tank	13	2
1460	Tank	13	13
1485	Tank	13	18
1434	Tank	13	4
1451	Tank	13	7
1449	Tank	13	7
1462	Tank	13	1
1586	Tank	13	1
1424	Tank	13	26
1430	Tank	13	3
2190	Tank	13	21
1468	Tank	13	32
1457	Tank	13	13
1412	Tank	13	37
1426	Tank	13	1
1461	Tank	13	4
2179	Tank	13	18
1576	Tank	13	16
1431	Tank	13	1
1425	Tank	13	24
1419	Tank	13	4
1421	Tank	13	4
1443	Tank	13	2
1592	Tank	13	7
1444	Tank	13	55
1588	Tank	13	11
1600	Tank	13	19
1450	Tank	13	8
2187	Tank	13	10
2186	Tank	13	31
1481	Tank	13	9
1479	Tank	13	6
1422	Tank	13	1
1463	Tank	13	2
1452	Tank	13	2
1410	Tank	13	6
1447	Tank	13	5
2196	Tank	13	1
1483	Tank	13	3
1472	Tank	13	4
2162	Tank	13	3
2189	Tank	13	5
2185	Tank	13	10
1496	Tank	13	4
1571	Tank	13	4
1432	Tank	13	8
1467	Tank	13	5
1442	Tank	13	12
1465	Tank	13	5
1572	Tank	13	4

## Sheet: Settler size 2020 in lab
SPECIE	Pstrig
Cohort	2020
Diameter max per colony
174 recruits were measured from photographs of 9 haphazardly selected substrates that were followed through time.
month (post-settlement)	max diameter (mm)
7	1.042
7	0.71
7	0.648
7	0.528
7	0.759
7	0.687
7	0.765
7	0.744
7	0.832
7	0.914
7	0.777
7	0.8
7	0.869
7	0.783
7	0.874
7	1.127
7	0.894
7	0.915
7	0.878
7	1.034
7	0.757
7	1.033
7	1.043
7	0.932
7	0.818
7	0.768
7	0.735
7	1.486
7	1.077
7	1.595
7	1.415
7	0.843
7	1.628
7	1.422
7	1.308
7	1.181
7	1.328
7	0.862
7	0.94
7	1.196
7	1.517
7	1.335
7	1.261
7	1.982
7	1.57
7	2.008
7	2.183
7	1.934
7	1.733
7	2.003
7	1.471
7	1.313
9	2.449
9	1.246
9	0.984
9	1.469
9	1.371
9	3.494
9	2.555
9	3.163
9	4.534
9	1.502
9	1.355
9	1.049
9	0.474
9	2.685
9	3.416
9	1.72
9	4.015
9	4.326
9	4.054
9	3.535
9	1.957
9	3.528
9	2.573
9	2.594
9	2.154
9	6.816
9	4.604
9	7.038
9	3.901
9	3.027
9	4.19
9	5.353
9	6.079
9	4.179
9	3.681
9	4.122
9	4.243
9	2.918
9	4.341
9	3.391
9	5.012
10	3.881
10	5.536
10	2.677
10	1.399
10	2.67
10	2.682
10	2.663
10	2.018
10	4.109
10	1.221
10	5.321
10	3.412
10	5.74
10	3.507
10	5.436
10	2.171
10	3.511
10	2.457
10	3.321
10	3.701
10	2.264
10	4.265
10	5.266
10	2.455
10	3.032
10	3.702
10	1.318
10	1.63
10	3.602
10	1.537
10	1.706
10	3.259
10	1.579
10	1.974
10	1.749
10	1.181
10	1.425
10	2.88
10	1.455
10	4.213
10	6.783
10	4.399
10	6.423
10	4.115
10	4.963
10	6.414
10	7.002
10	7.746
10	9.122
10	6.645
10	4.663
10	4.446
10	7.176

## Sheet: Settlers_size per SU_2020 reef
SPECIE	Pstrig
Cohort	2020
For the phase of outplant 145 SU were used from the general culture that was obtained from the same cohort or recruits.
After outplanting to the reef at month 13, each tagged substrate was surveyed at month 14 and 16 for # live recruits. A subset of 42 of these substrates were examined carefully to measure max diameter of recruits with a mm ruler
NA = substrate was not found during this survey
NM= Substrates not included in the size measures
*The measurements of recruits that could be measured in the field are included, in particular cases the position of the substrate did not allow the measurement.
		# Recruts per substrate unit
		Month 14			Month 14.5			Month 16
	Substrate	# recruits	*recruit size (mm)		# recruits	*recruit size (mm)		# recruits	*recruit size (mm)
	1593	16	4		1	5		1	5
	1599	1	9		1	8		1	7
	1436	3	4		2	6		2	6
			1			3			3
			1
	1454	5	6		5	7		4	7
			4			4			4
			2			2			2
			2			2			2
			5			5
	2123	1	8		1	9		1	12
	2175	2	NM		2	NM		2	NM
	1583	2	NM		2	NM		2	NM
	1577	3	NM		3	NM		1	NM
	2166	20	NM		20	NM		12	NM
	1598	2	NM		2	NM		2	NM
	1417	3	NM		3	NM		3	NM
	1590	1	NM		1	NM		1	NM
	1574	2	NM		1	NM		1	NM
	1584	2	NM		2	NM		1	NM
	1438	15	NM		10	NM		9	NM
	1401	1	NM		1	NM		1	NM
	1493	9	NM		9	NM		9	NM
	1409	3	NM		3	NM		1	NM
	1406	1	NM		1	NM		1	NM
	1579	17	NM		15	NM		NA	NM
	1464	2	15		2	15		3	15
			10			12			12
	1490	17	7		13	7		13	13
			7			7			13
			7			6			13
			7			8			13
			7			8			11
			8			8			10
			9			9			10
			9			9			10
			10			9			10
			10			10			10
			10			10			9
			18			11			9
						20
	1497	19	13		15	10		12	9
			9			9			8
			7			7			7
			7			6			5
			7			5			5
			5			5			5
			4			5			3
			3			3			2
			2			3			2
			2
			2
			1
			1
			1
			1
	1491	12	10		7	10		7	8
			10			10			8
			10			7			2
			9			6			2
			8			4			11
			3			4			4
			3			3			4
	2177	1	18		1	14		1	18
	1476	1	9		1	9		1	8
	1428	5	10		5	8		5	10
			3			1			4
			3			1			3
			1			1			2
			2			1
	2188	4	10		2	10		1	10
			6			6
	1477	1	NM		0	NM		NA	NM
	1575	2	NM		0	NM		NA	NM
	2174	3	NM		2	NM		2	NM
	1596	14	NM		7	NM		1	NM
	1473	9	NM		7	NM		7	NM
	2167	44	NM		44	NM		17	NM
	2161	10	NM		4	NM		3	NM
	1448	3	NM		3	NM		3	NM
	2165	17	NM		17	NM		4	NM
	2172	1	NM		1	NM		1	NM
	1492	11	NM		9	NM		7	NM
	1437	2	NM		1	NM		NA	NM
	1469	22	NM		15	NM		12	NM
	2180	3	NM		2	NM		1	NM
	1487	10	NM		7	NM		NA	NM
	1471	12	NM		9	NM		9	NM
	1427	4	6		3	10		1	8
			5			7
			5			4
			1			6
	1435	14	9		6	10		2	10
			5			5			3
			5			4
			3			3
			3			3
			2			2
			1
	1433	5	9		5	10		3	10
			7			6			5
			5			5			5
			5			5
			3			2
	1495	5	7		4	7		1	8
			7			5
			8			5
			4			4
	2168	6	10		4	11		4	12
			11			9			10
			7			8			9
									2
	1478	15	4		10	5		10	5
			4			5			5
			4			4			4
			3			3			5
			3			3			5
			3			3
			3			3
			3
			2
	1446	15	4		12	5		12	5
			3			4			4
			2			3			3
			2			3			3
			2			3			2
			2			3			2
			2			3			2
			1			3			2
			1			3			2
			1						1
			1						1
	1407	6	9		5	10		5	12
			8			10			9
			7			9			4
			3						2
			3
	1458	21	9		5	12		5	13
			4			5			8
									5
									2
									1
	1423	9	7		7	12		7	13
			6			6			8
			5			6			7
			4			4			5
			4			4			4
			3			3			4
			3						3
	1415	1	4		1	4		1	6
	2158	23	NM		15	NM		9	NM
	1456	16	NM		11	NM		11	NM
	1498	7	NM		5	NM		4	NM
	2163	31	NM		20	NM		17	NM
	1494	5	NM		4	NM		2	NM
	1482	28	NM		10	NM		10	NM
	1595	8	NM		7	NM		7	NM
	2178	3	NM		3	NM		3	NM
	1500	16	NM		9	NM		5	NM
	1414	23	NM		7	NM		5	NM
	1480	8	NM		8	NM		7	NM
	1484	3	NM		2	NM		1	NM
	1488	8	NM		8	NM		8	NM
	1408	1	NM		1	NM		1	NM
	1440	1	NM		1	NM		1	NM
	2176	2	NM		0	NM		0	NM
	1416	18	7		6	8		2	9
			6			5			8
			6			2
			5
			5
			1
	1594	8	3		2	4		1	NM
			2
	1580	9	10		5	10		0
			7			7
			5			5
			4			4
			2			2
	1403	11	12		10	12		3	15
			9			9			9
			9			5			7
			8			5
			4			4
			4			3
			3
			3
			2
			2
	2183	7	9		7	12		7	12
			8			9			11
			6			5			8
			3			5			8
						3			6
									3
									2
	1570	3	NM		3	NM		5	NM
	2181	49	NM		40	NM		20	NM
	2169	64	NM		29	NM		25	NM
	1573	2	NM		2	NM		1	NM
	1582	2	NM		0	NM		0	NM
	1405	6	NM		1	NM		1	NM
	1575	2	NM		1	NM		NA	NM
	1581	3	NM		1	NM		1	NM
	1404	9	NM		6	NM		5	NM
	1466	10	NM		6	NM		5	NM
	1489	3	NM		2	NM		1	NM
	2164	64	NM		9	NM		5	NM
	2184	20	NM		7	NM		4	NM
	2170	1	NM		1	NM		0	NM
	1499	14	NM		7	NM		12	NM
	1587	3	NM		0	NM		0	NM
	1429	11	15		7	17		7	20
			9			10			13
			9			1			12
			9			7			9
			4			7			5
			2						5
			1						3
	2182	31	15		10	10		8	15
			14			4			9
			5			2			4
			2			2			4
			1			2			3
			1			2			3
			1			2			3
			1			2			2
			1						1
			1						1
	1597	3	18		2	11		1	12
			14
	1474	2	4		2	5		2	10
						1			3
	1460	13	12		7	11		5	13
			11			9			11
			8			8			9
			7			8			8
			6			5			7
			4			5
			4			2
						2
	1485	18	4		7	9		7	9
			11			5			7
			2			4			4
			8			3			4
			4			3			2
			2			2			3
			3			2			2
	1434	4	10		3	11		3	15
			4			4			7
			3			3			4
	1451	7	10		3	10		3	13
			8			9			9
			5			5			6
	1449	7	NM		7	NM		7	NM
	1462	1	NM		1	NM		0	NM
	1586	1	NM		1	NM		1	NM
	1424	26	NM		7	NM		6	NM
	1430	3	NM		1	NM		1	NM
	2190	21	NM		14	NM		14	NM
	1468	32	NM		1	NM		0	NM
	1457	13	NM		7	NM		2	NM
	1412	37	NM		30	NM		21	NM
	1426	1	NM		1	NM		1	NM
	1461	4	NM		1	NM		1	NM
	2179	18	NM		11	NM		5	NM
	1576	16	NM		11	NM		11	NM
	1431	1	NM		1	NM		1	NM
	1425	24	NM		19	NM		7	NM
	1419	4	NM		2	NM		1	NM
	1421	4	NM		2	NM		2	NM
	1443	2	NM		1	NM		1	NM
	1592	7	NM		3	NM		3	NM
	1444	55	NM		32	NM		32	NM
	1588	11	NM		9	NM		9	NM
	1600	19	NM		12	NM		7	NM
	1450	8	5		3	7		3	7
						3			7
									3
	2187	10	8		5	NM		3	10
			6			NM			8
			4			NM			4
			4			NM
			2			NM
	2186	31	4		16	6		15	8
			2			5			8
			5			5			7
			4			4			7
			2			4			5
			2			3			6
			2			3			5
			5			3			5
			2			2			5
			6			2			4
			5			2			4
			7			2			4
			3			2			3
			2			2			3
			2			2			3
			9			3
	1481	9	NM		6	NM		2	NM
	1479	6	NM		4	NM		4	NM
	1422	1	NM		0	NM		0	NM
	1463	2	NM		1	NM		1	NM
	1452	2	NM		1	NM		1	NM
	1410	6	NM		4	NM		4	NM
	1447	5	NM		5	NM		3	NM
	2196	1	NM		1	NM		1	NM
	1483	3	NM		3	NM		1	NM
	1472	4	NM		3	NM		2	NM
	2162	3	NM		1	NM		1	NM
	2189	5	NM		3	NM		3	NM
	2185	10	NM		2	NM		2	NM
	1496	4	NM		2	NM		2	NM
	1571	4	NM		4	NM		3	NM
	1432	8	5		4	7		4	3
			3			4			4
			2			4			5
			2			3			3
			2
	1467	5	4		3	4		3	7
			6			5			8
			8			5			6
	1442	12	12		4	9		4	8
			10			5			6
			5			5			5
			5			4			4
			5
			5
			4
			5
			3
			3
			2
	1465	5	5		4	10		4	9
			6			9			7
			10			7			6
			9			5			11
			3
	1572	4	5		4	9		4	9
			8			7			6
			9			5			4
			4			4			3
